# Supplementary material for: Consensus gene modules strategy identifies candidate blood-based biomarkers for primary Sjögren’s disease
Source: bioRxiv or medRxiv preprint supplement (doi:10.1101/2023.07.05.23292036), 2023-07-06
Supplement: Supplementary file [file media-2.pdf]

Supplementary materials

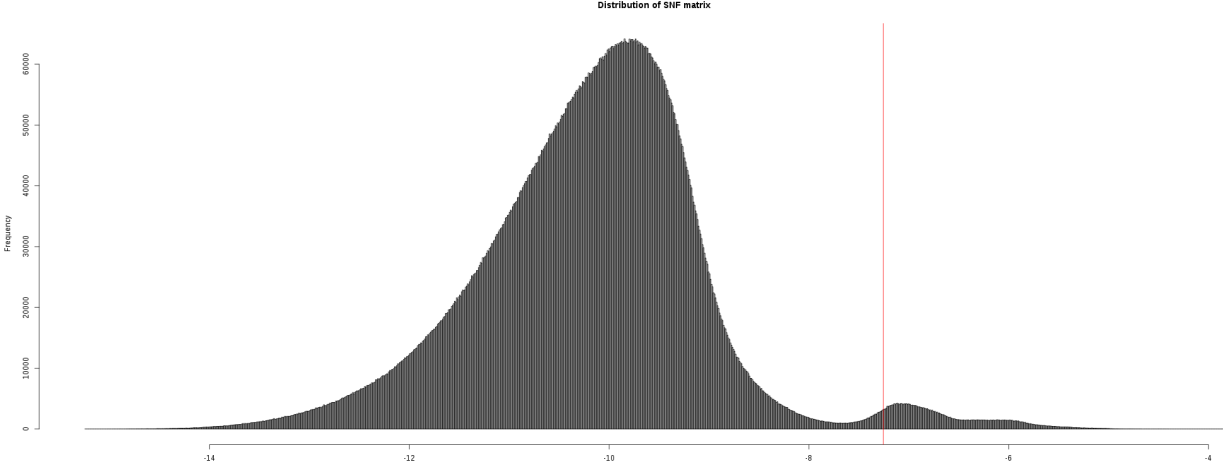

**Supplementary Fig1.** Histogram showing the distribution of weights in the SNF matrix. The x-axis denotes the weight range (logged) and the y-axis represents the frequency of weights. A vertical red line indicates the discretization threshold corresponding to the 0.975<sup>th</sup> quantile (for better visualization).

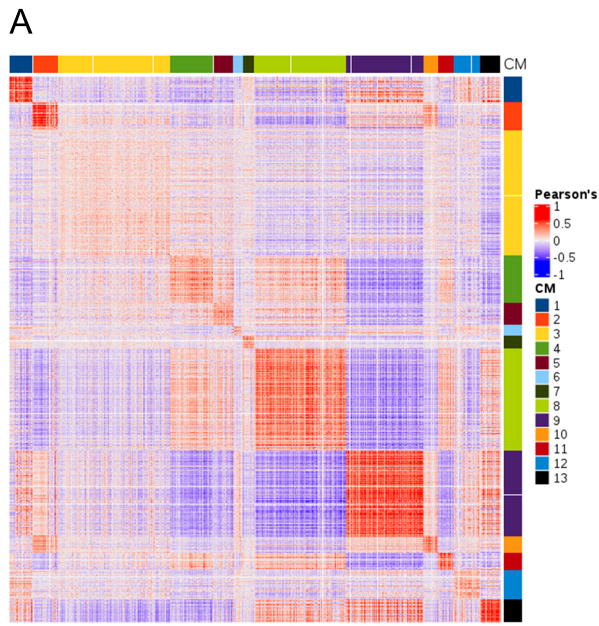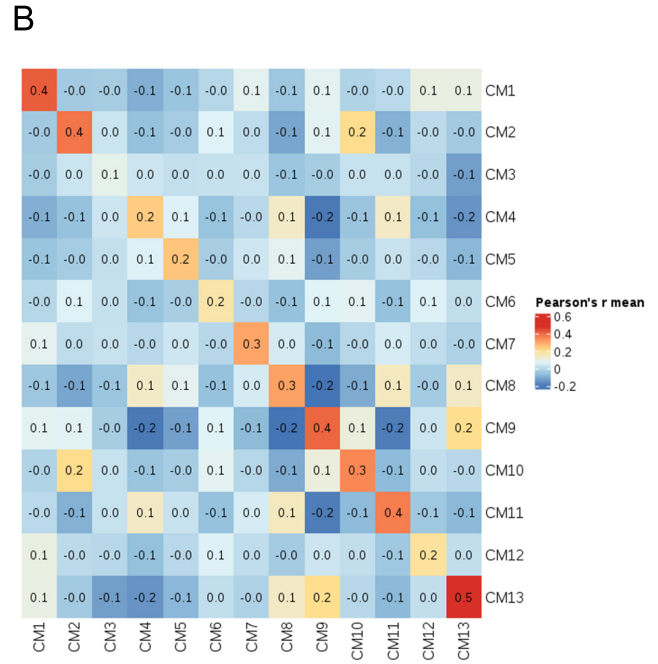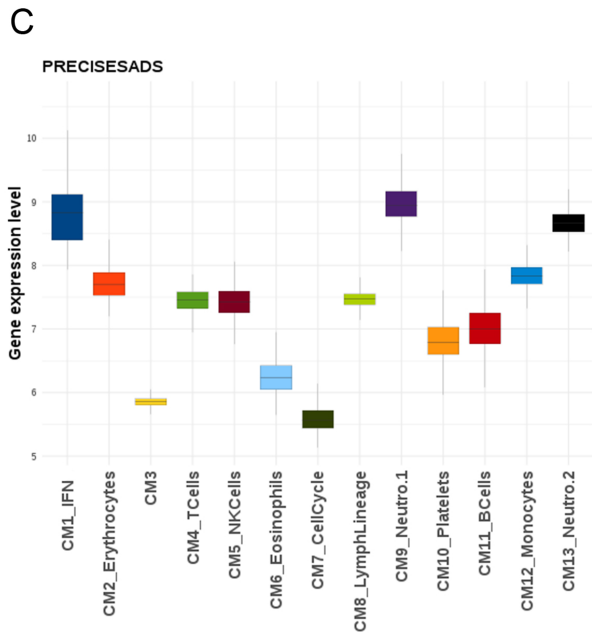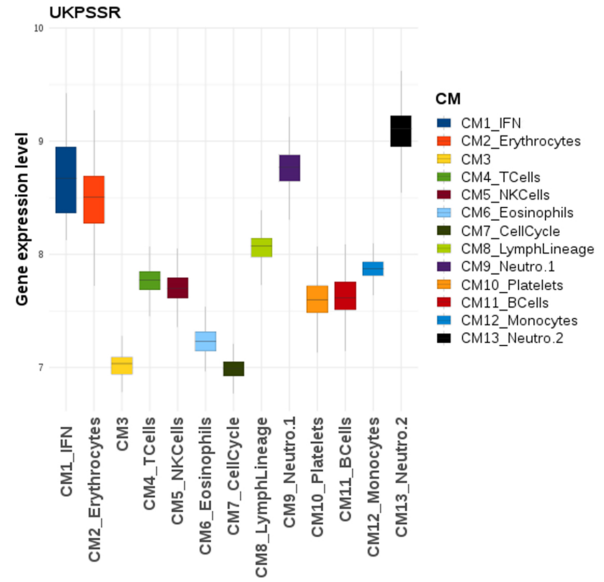

**Supplementary Fig2.** A) Average correlation of the 4 input datasets B) Average of average correlation matrices C) Average gene expression levels for each CM in cohorts profiled by RNA-sequencing

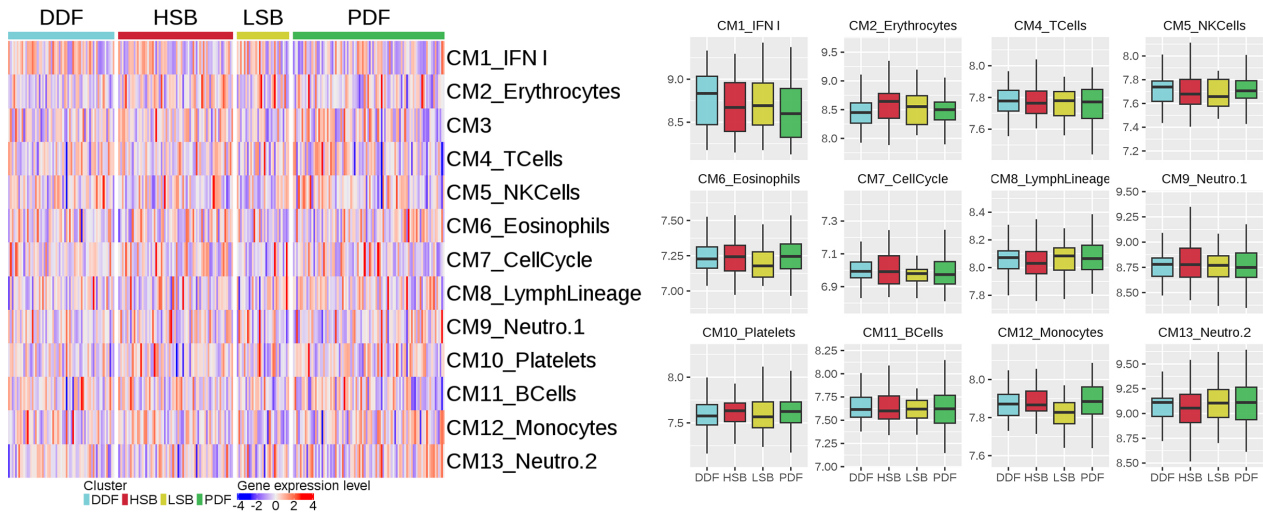

**Supplementary Fig3.** CMs scores across patient subgroups of the Tarn classification in UKPSSR cohort

A

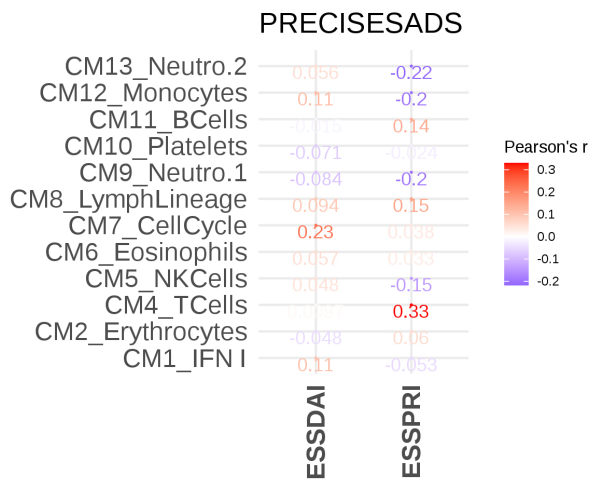

B

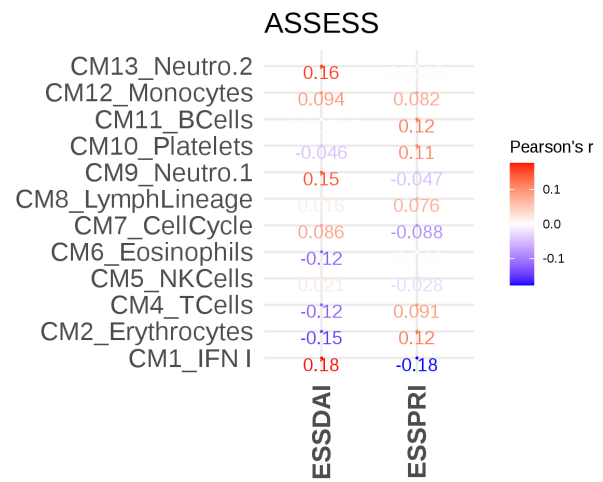

**Supplementary Fig4.** Pearson's correlation between average CMs expression and ESSDAI and ESSPRI scores in A) PRECISESADS and B) ASSESS cohorts

**A**

**PRECISESADS**

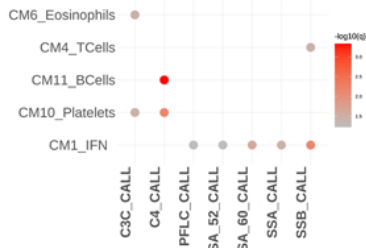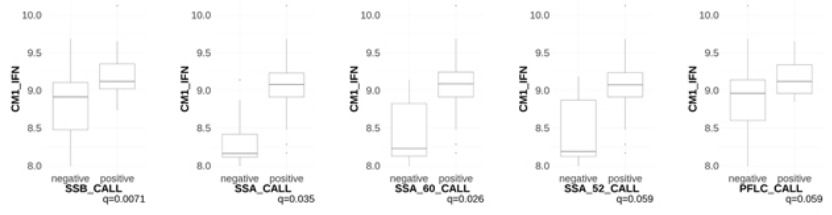

**B**

**ASSESS**

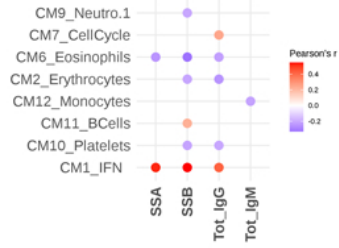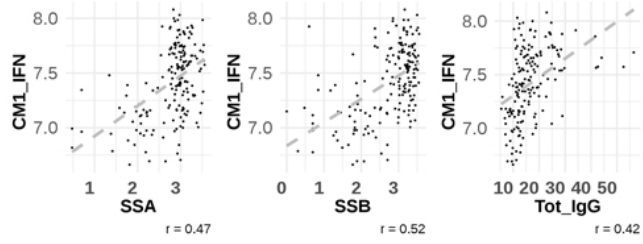

**Supplementary Fig5.** Pearson's correlation between average CMs expression and autoantibodies levels in A) PRECISESADS and B) ASSESS cohorts



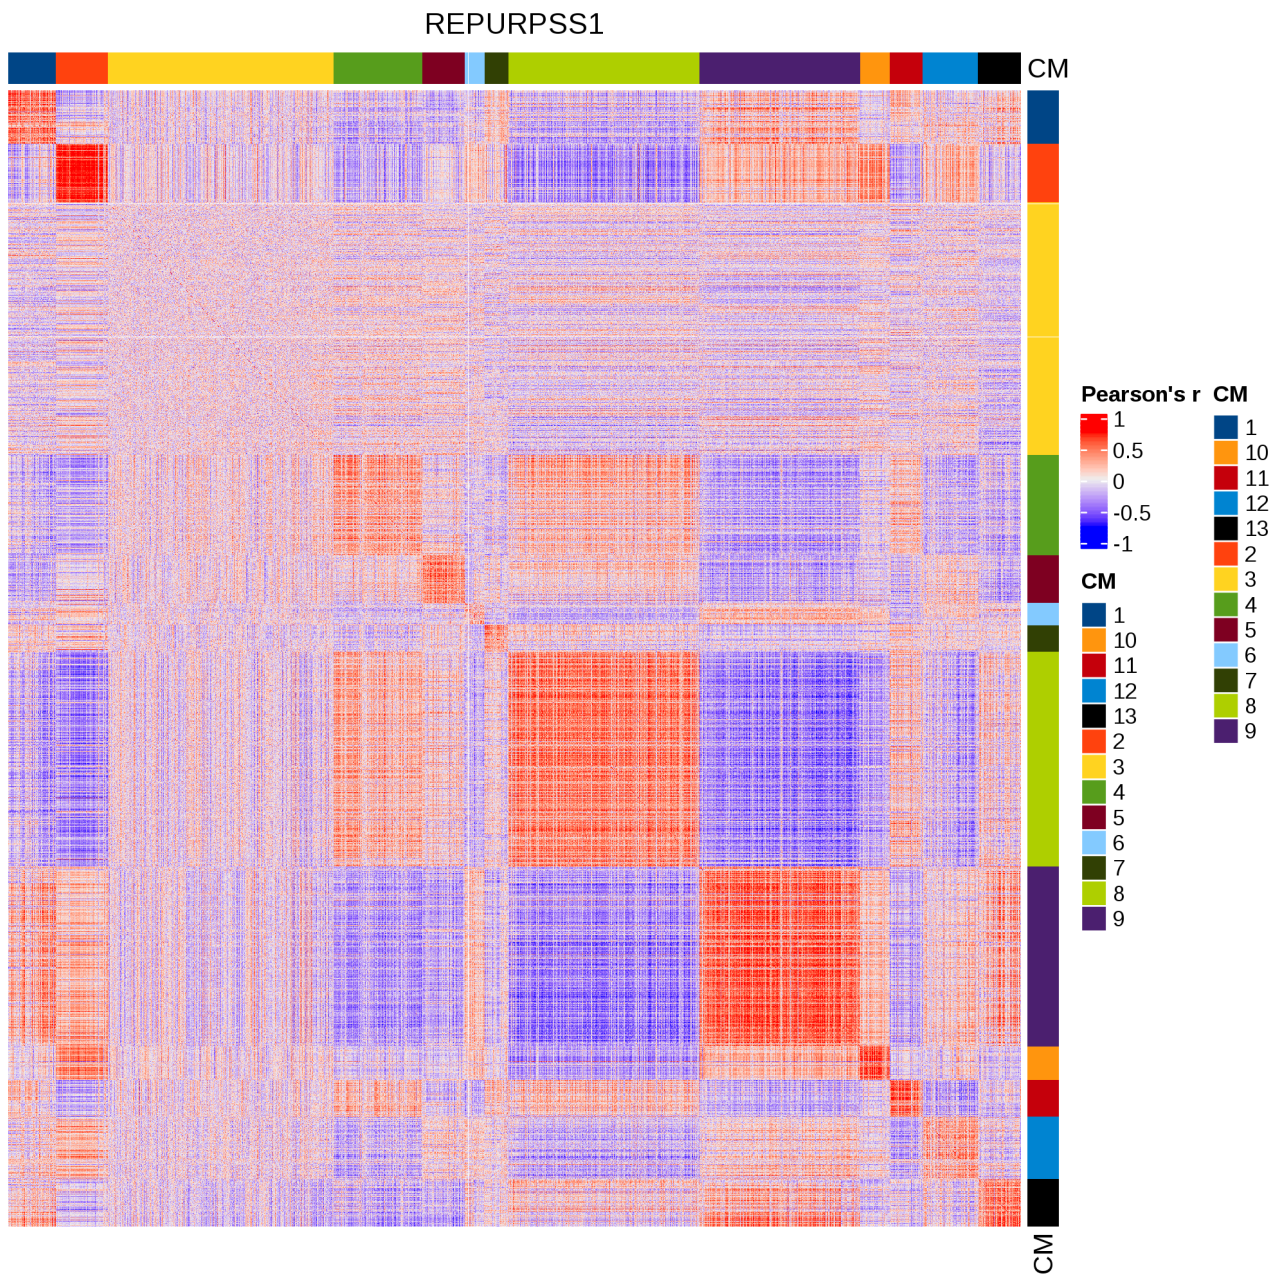

**Supplementary Fig7.** Correlation matrix in REPURPSS-1 cohort, sorted by CMs.

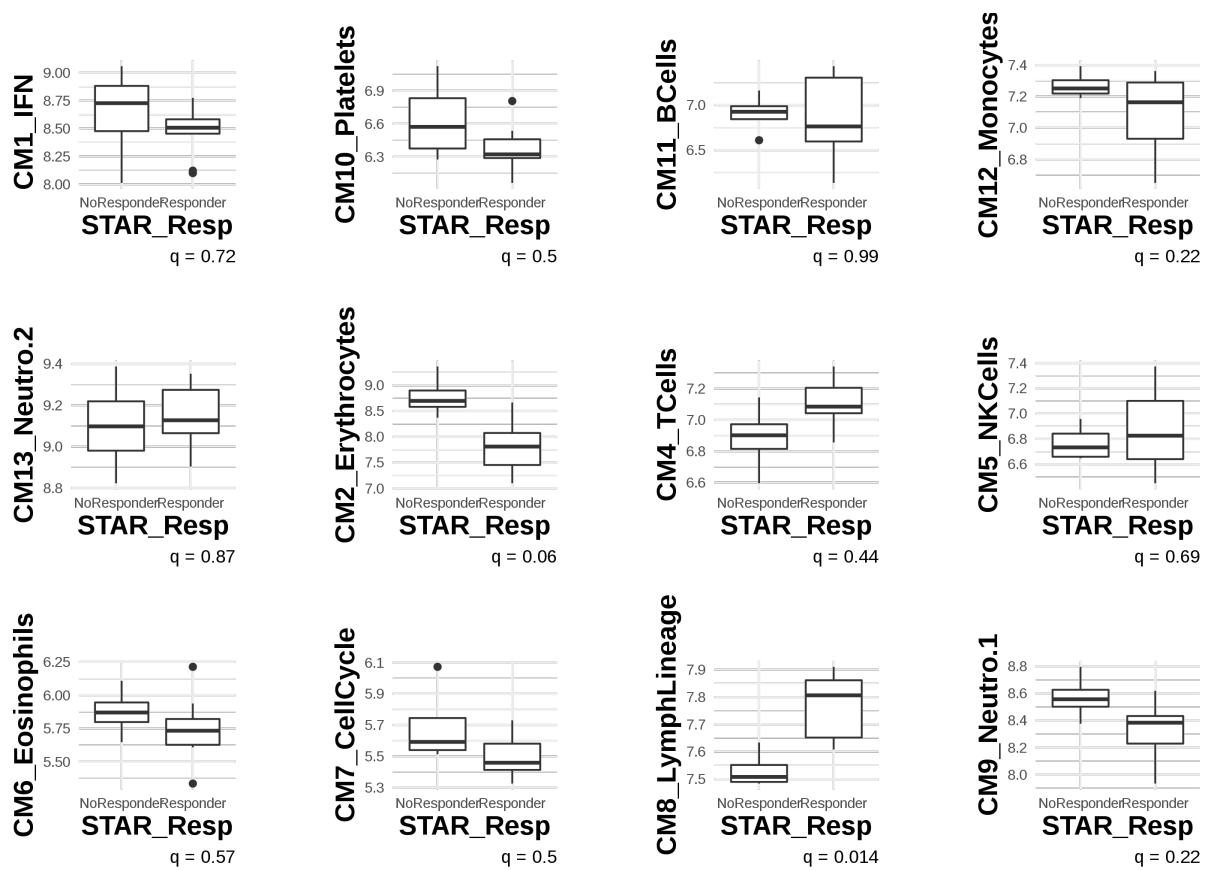

Supplementary Fig8. Boxplots of average expression of the CMs versus response status.
